# Supplementary material for: Phytophthora Species Involved in Alnus glutinosa Decline in Portugal
Source: MDPI journal article supplement (doi:10.3390/pathogens12020276), 2023-02-08
Supplement: s1 [file s1]

**Table S1.** *Phytophthora* species reported in natural ecosystems in Portugal.

| Species                   | Host                                                                                                                                                                                                                                                                                                                                                                          | References                |
|---------------------------|-------------------------------------------------------------------------------------------------------------------------------------------------------------------------------------------------------------------------------------------------------------------------------------------------------------------------------------------------------------------------------|---------------------------|
| <i>P. alticola</i>        | <i>Eucalyptus globulus</i>                                                                                                                                                                                                                                                                                                                                                    | [57]                      |
| <i>P. amnicola</i>        | <i>Alnus glutinosa</i>                                                                                                                                                                                                                                                                                                                                                        | This study                |
| <i>P. asparagi</i>        | <i>A. glutinosa</i>                                                                                                                                                                                                                                                                                                                                                           | This study                |
| <i>P. bilorbang</i>       | water                                                                                                                                                                                                                                                                                                                                                                         | This study                |
| <i>P. cactorum</i>        | <i>A. glutinosa</i>                                                                                                                                                                                                                                                                                                                                                           | This study                |
| <i>P. cambivora</i>       | <i>Castanea sativa</i>                                                                                                                                                                                                                                                                                                                                                        | [58,59]                   |
| <i>P. castanetorum</i>    | <i>C. sativa</i>                                                                                                                                                                                                                                                                                                                                                              | [60]                      |
| <i>P. chlamydospora</i>   | <i>A. glutinosa</i>                                                                                                                                                                                                                                                                                                                                                           | This study                |
| <i>P. cinnamomi</i>       | <i>A. glutinosa</i> , <i>Arbutus unedo</i> ,<br><i>Calluna vulgaris</i> , <i>Castanea sativa</i> ,<br><i>Cistus crispus</i> , <i>C. ladanifer</i> ,<br><i>C. populifolius</i> , <i>C. salvifolius</i> ,<br><i>E. globulus</i> , <i>Genista triacanthos</i> ,<br><i>Pinus pinaster</i> , <i>Quercus rotundifolia</i> ,<br><i>Q. robur</i> , <i>Q. suber</i> , <i>Ulex</i> spp. | [56,57,61–64]; this study |
| <i>P. condilina</i>       | water                                                                                                                                                                                                                                                                                                                                                                         | [65]                      |
| <i>P. gonapodyides</i>    | <i>A. glutinosa</i> , water                                                                                                                                                                                                                                                                                                                                                   | [65]; this study          |
| <i>P. inundata</i>        | water                                                                                                                                                                                                                                                                                                                                                                         | [65]                      |
| <i>P. lacustris</i>       | <i>A. glutinosa</i>                                                                                                                                                                                                                                                                                                                                                           | [18]                      |
| <i>P. multivora</i>       | <i>A. glutinosa</i>                                                                                                                                                                                                                                                                                                                                                           | This study                |
| <i>P. plurivora</i>       | <i>A. glutinosa</i> , water                                                                                                                                                                                                                                                                                                                                                   | [65], this study          |
| <i>P. polonica</i>        | <i>A. glutinosa</i>                                                                                                                                                                                                                                                                                                                                                           | This study                |
| <i>P. pseudocryptogea</i> | <i>A. glutinosa</i> , water                                                                                                                                                                                                                                                                                                                                                   | [65], this study          |
| <i>P. psychrophila</i>    | <i>Q. rotundifolia</i>                                                                                                                                                                                                                                                                                                                                                        | [66]                      |
| <i>P. quercina</i>        | <i>Q. rotundifolia</i> , <i>Q. pyrenaica</i>                                                                                                                                                                                                                                                                                                                                  | [60]                      |
| <i>P. rosacearum</i>      | <i>A. glutinosa</i>                                                                                                                                                                                                                                                                                                                                                           | This study                |
| <i>P. ramorum</i>         | <i>Viburnum</i> sp.                                                                                                                                                                                                                                                                                                                                                           | [67]                      |
| <i>P. xalni</i>           | <i>A. glutinosa</i>                                                                                                                                                                                                                                                                                                                                                           | [18]                      |

**Table S2.** *Phytophthora* species reported as pathogenic on *Alnus glutinosa*.

| Species                             | References     |
|-------------------------------------|----------------|
| <i>P. amnicola</i>                  | This study     |
| <i>P. asparagi</i>                  | This study     |
| <i>P. acerina</i>                   | [8]            |
| <i>P. cactorum</i>                  | [7]            |
| <i>P. cambivora</i>                 | [68,69]        |
| <i>P. chlamydospora</i>             | This study     |
| <i>P. cinnamomi</i>                 | [68]           |
| <i>P. citrophthora</i>              | [70]           |
| <i>P. cryptogea</i>                 | [68]           |
| <i>P. gallica</i>                   | [71]           |
| <i>P. gonapodyides</i>              | [7]            |
| <i>P. inundata</i>                  | [72]           |
| <i>P. lacustris</i>                 | [7,72]         |
| <i>P. megasperma</i>                | [7]            |
| <i>P. multivora</i>                 | This study     |
| <i>P. nicotianae</i>                | [70]           |
| <i>P. palmivora</i>                 | [70]           |
| <i>P. plurivora</i>                 | [7,8,14,15,73] |
| <i>P. polonica</i>                  | [55]           |
| <i>P. pseudocryptogea</i>           | [8]            |
| <i>P. pseudosyringae</i>            | [74]           |
| <i>P. ramorum</i>                   | [73]           |
| <i>P. rubi</i>                      | [68]           |
| <i>P. syringae</i>                  | [55]           |
| <i>P. rosacearum</i>                | This study     |
| <i>P. uniformis</i>                 | [15,68]        |
| <i>P. ×alni</i>                     | [15,68]        |
| <i>P. ×multiformis</i>              | [15,68]        |
| <i>Phytophthora</i> taxon raspberry | [72]           |
